# Supplementary material for: Electrodeposition of silver nanostructures: from polygons to dendrites
Source: Royal Society of Chemistry journal article supplement (doi:10.1039/c3ce26886a), 2013-01-01
Supplement: c3ce26886a.pdf [file c3ce26886a.pdf]

## Electronic Supplementary Information

# Electrodeposition of Silver Nanostructures: From Polygons to Dendrites

R. Sivasubramanian and M. V. Sangaranarayanan\*

Department of chemistry, Indian Institute of Technology Madras, Chennai – 36. India

Corresponding author Email ID: sangara@iitm.ac.in

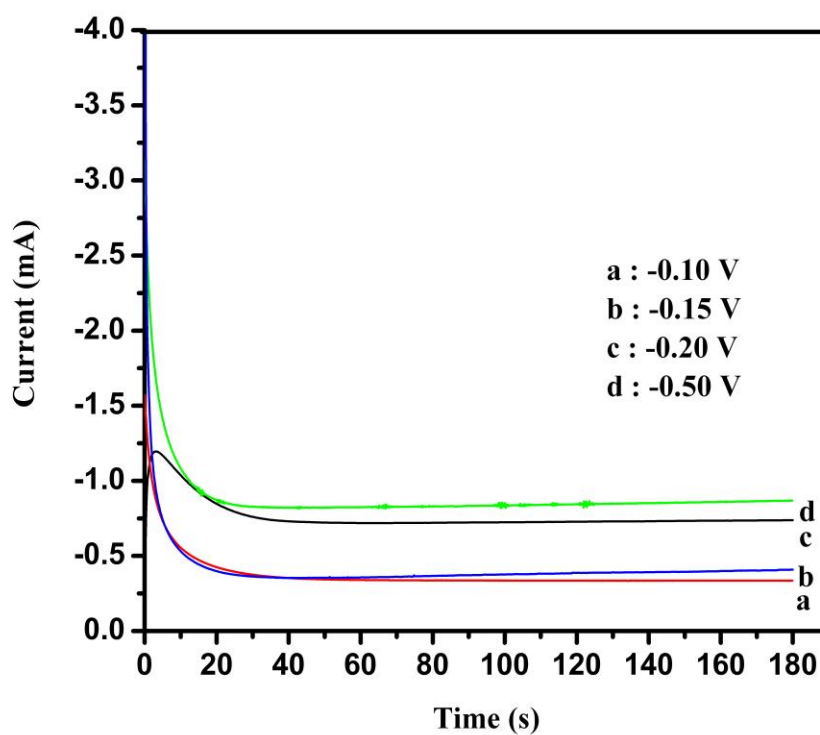

**Fig. S1** Chronoamperometric current for the deposition of Ag on ITO at various potentials from a solution of 0.1 M  $\text{KNO}_3$  and  $\text{AgNO}_3$  taken at different concentrations, 10 mM (a-c) and 5 mM (d).

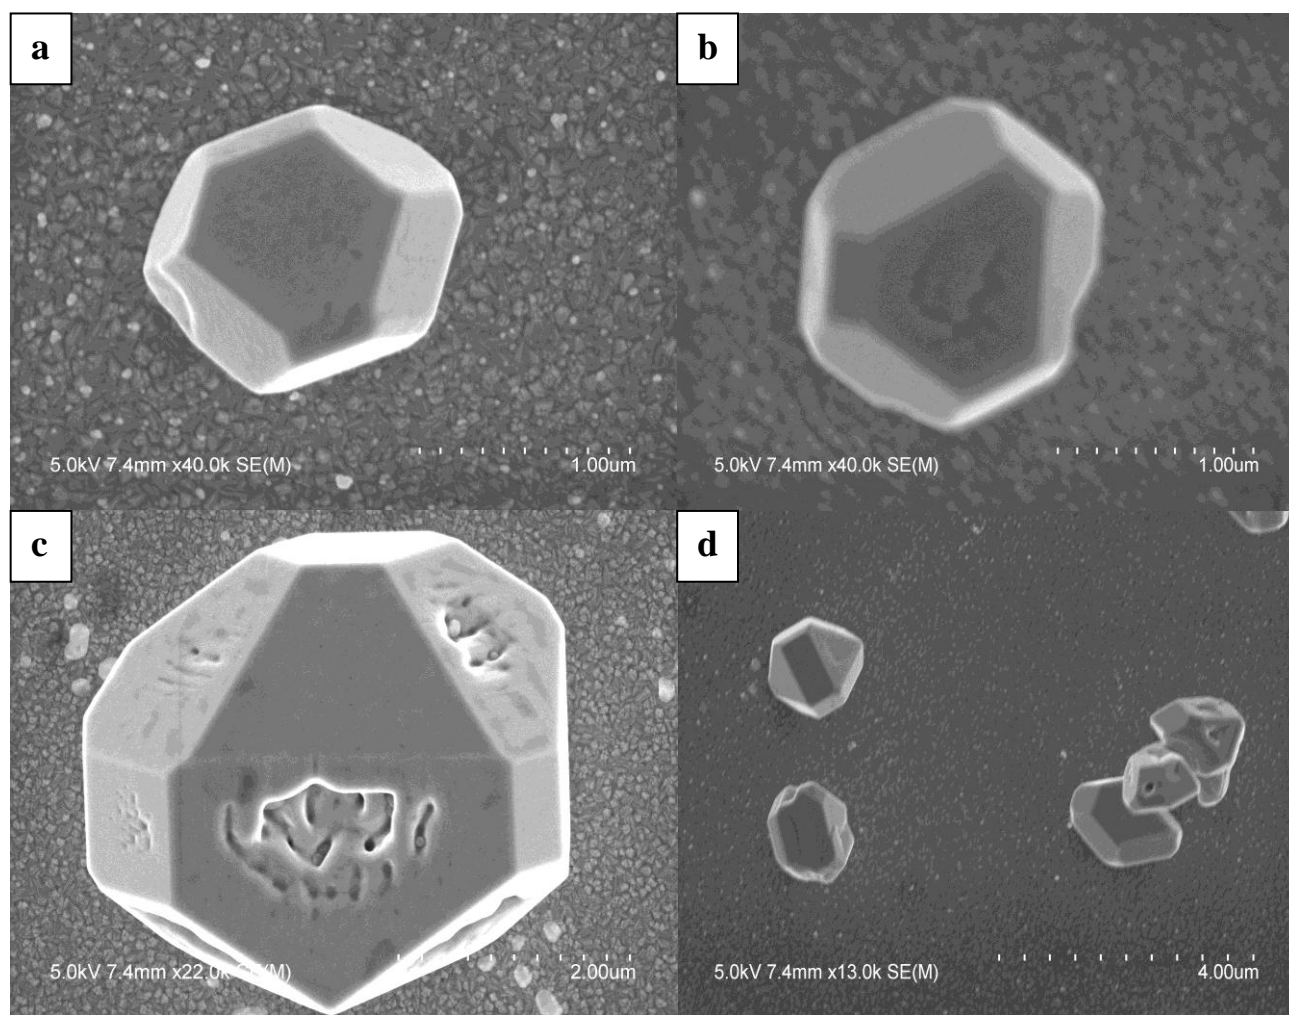

**Fig. S2** SEM images of silver polyhedron structures obtained from a solution of 0.1 M  $\text{KNO}_3$  and 10 mM  $\text{AgNO}_3$  at different deposition potentials (a) and (b) -0.15 V; (c) and (d) -0.10 V.

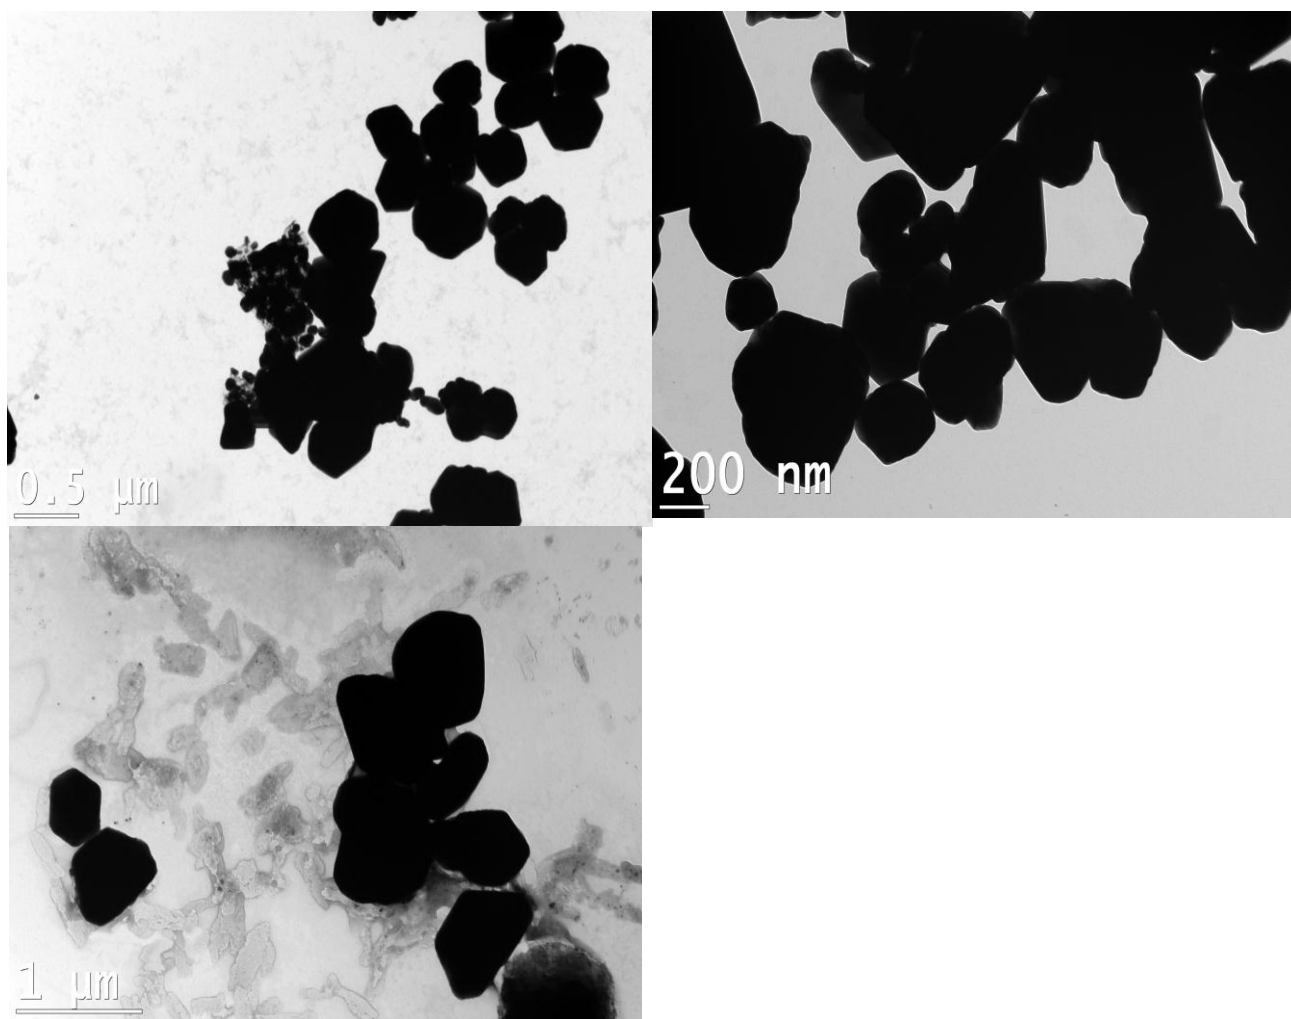

**Fig. S3** Enlarged TEM images of Silver polygonal nanostructures obtained from a solution of 0.1 M  $\text{KNO}_3$  and 10 mM  $\text{AgNO}_3$  at a deposition potential of -0.15 V for a period of 180 s.

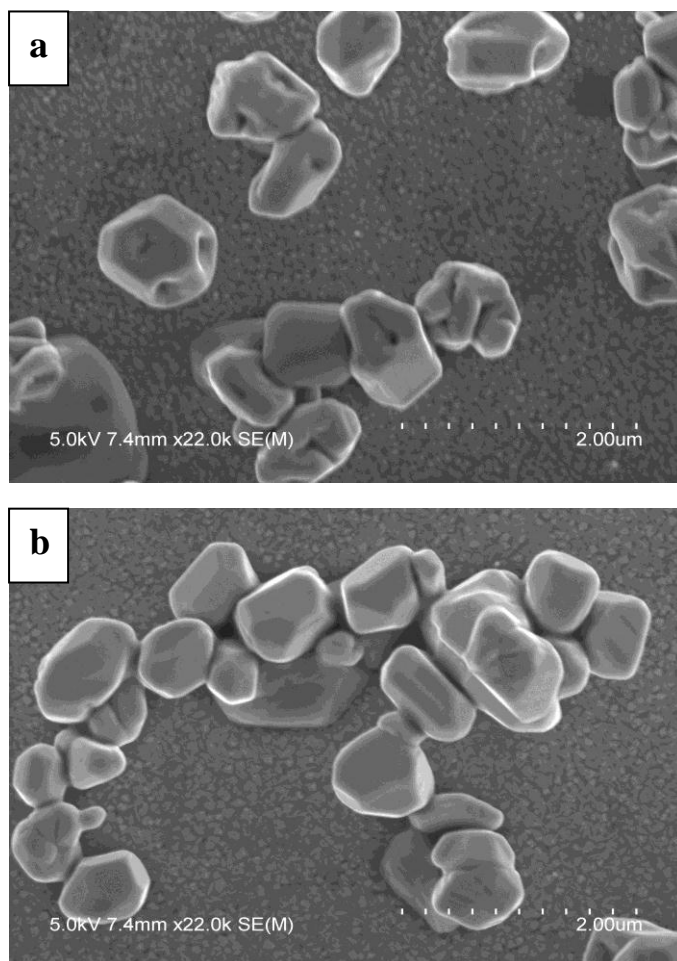

**Fig. S4** SEM images of ITO surface upon deposition of silver from 0.1 M  $\text{KNO}_3$  and 10 mM  $\text{AgNO}_3$  at two different potentials; (a) -0.1 V : polygons with pores and (b) -0.2 V : polygons with aggregations. The deposition time is 180 s in each.

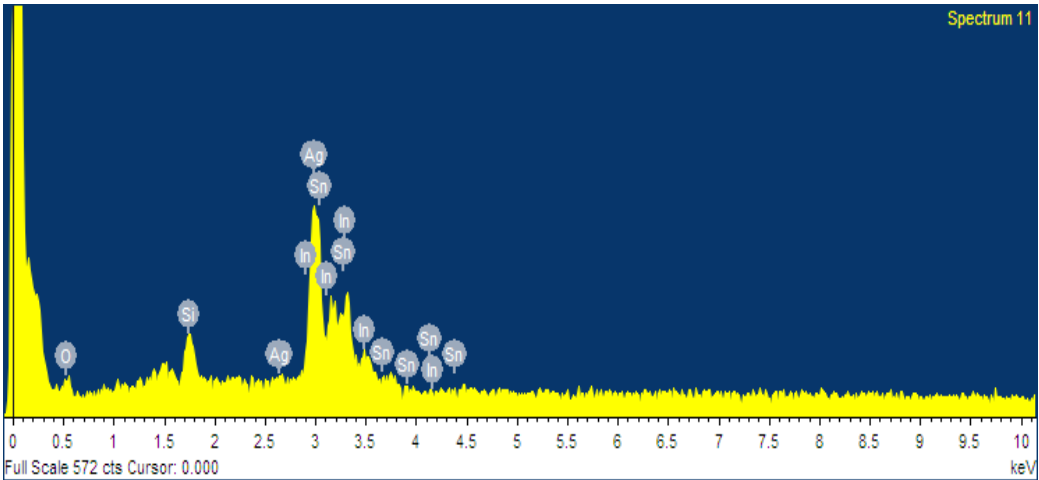

| Elements | Weight % | Atomic % |
|----------|----------|----------|
| O k      | 15.95    | 52.87    |
| Si K     | 4.68     | 8.83     |
| Ag L     | 55.14    | 27.10    |
| In L     | 24.19    | 11.19    |
| Sn L     | 0.05     | 0.01     |

**Fig. S5** EDAX spectrum of electrodeposited silver on ITO at a potential of -0.15 V from a solution of 0.1 M KNO<sub>3</sub> and 10 mM AgNO<sub>3</sub>.

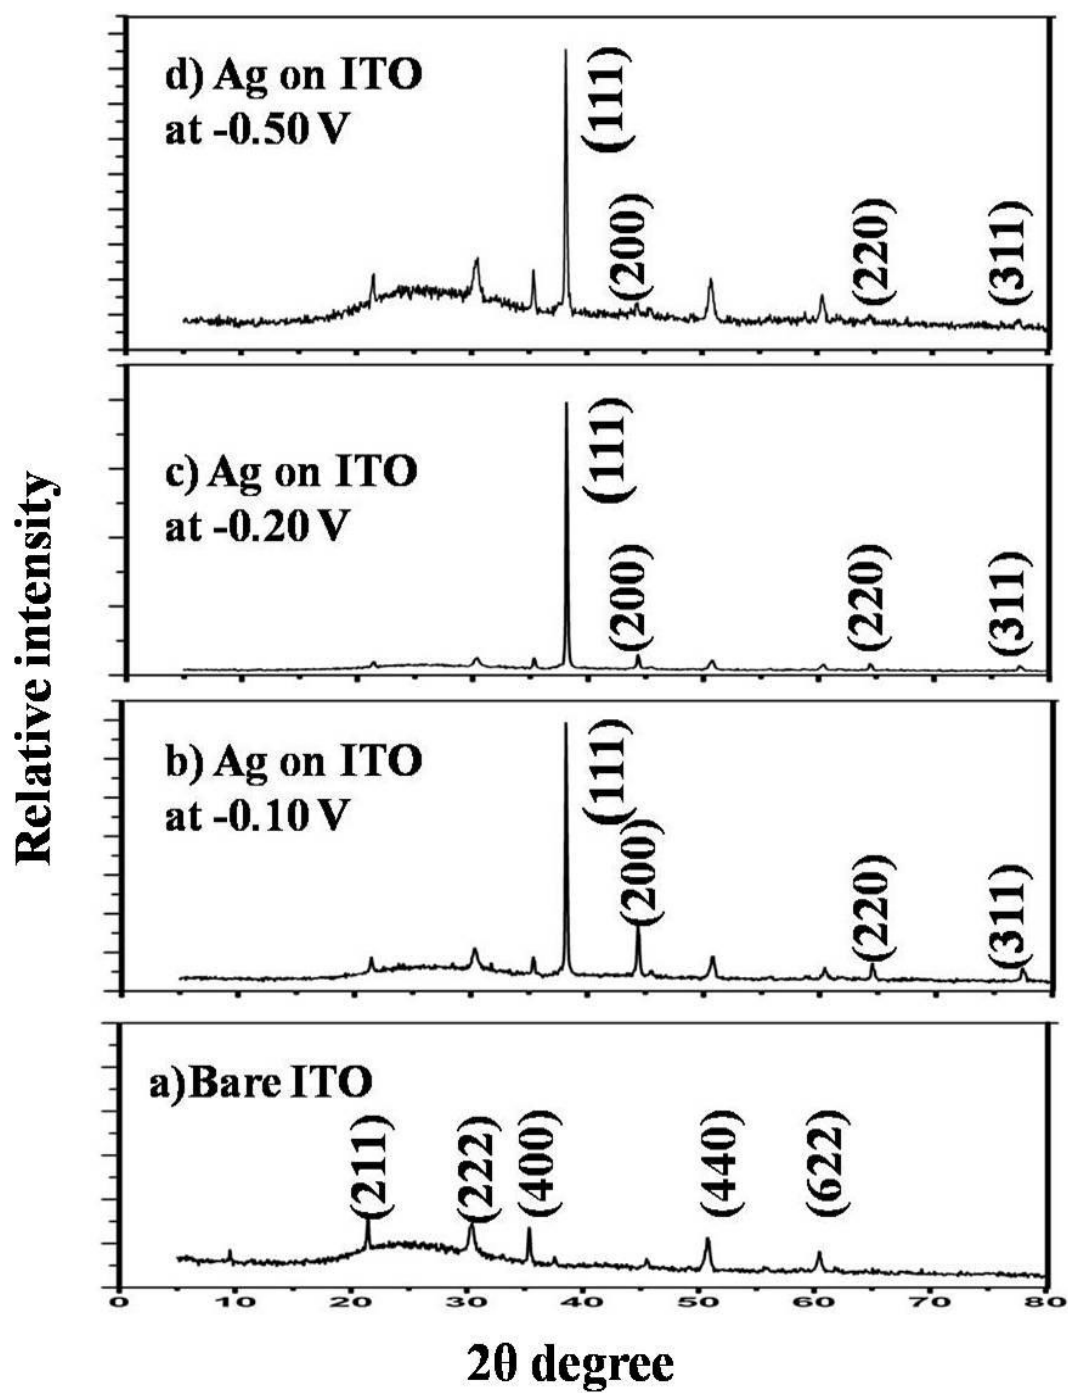

**Fig. S6** XRD spectrum of electrodeposited Ag on ITO at various potentials.
